# Supplementary material for: Modified Keystone Perforator Island Flap for Tension-Reducing Coverage of Axillary Defects Secondary to Radical Excision of Chronic Inflammatory Skin Lesions: A Retrospective Case Series
Source: Biomed Res Int. 2022 Sep 29;2022:5600450. doi: 10.1155/2022/5600450 (PMC9537010; doi:10.1155/2022/5600450)
Supplement: Supplementary Materials — Supplement 1: shows postoperative shoulder joint movement of a patient (case 8) at the 5-month follow-up evaluation. The STROBE checklist is also provided as Supplement 2. [file 5600450.f1.zip]

Archive with 2 entries (2 files):
- Supplement 2_STROBE Checklist.docx
- Supplementary Material.docx
